# Supplementary material
Source: PubMed Central journal article supplement (PMC7502513)

## **Serotonin Transporter Protein in Autopsied Brain of Chronic Users of Cocaine**

Junchao Tong<sup>1,2,\*</sup>, Jeffrey H. Meyer<sup>3</sup>, Isabelle Boileau<sup>4</sup>, Lee-Cyn Ang<sup>5</sup>, Paul J. Fletcher<sup>6</sup>, Yoshiaki Furukawa<sup>7</sup>, and Stephen J. Kish<sup>2</sup>

<sup>1</sup> Preclinical Imaging, Brain Health Imaging Centre, Centre for Addiction and Mental Health, Toronto, ON, Canada

<sup>2</sup> Human Brain Laboratory, Brain Health Imaging Centre, Centre for Addiction and Mental Health, Toronto, ON, Canada

<sup>3</sup> Brain Health Imaging Centre and Campbell Family Mental Health Research Institute, Centre for Addiction and Mental Health, Toronto, ON, Canada

<sup>4</sup> Addiction Imaging Research Group, Campbell Family Mental Health Research Institute, Centre for Addiction and Mental Health, Toronto, ON, Canada

<sup>5</sup> Division of Neuropathology, London Health Sciences Centre, University of Western Ontario, London, ON, Canada

<sup>6</sup> Section of Biopsychology, Campbell Family Mental Health Research Institute, Centre for Addiction and Mental Health; Department of Psychology, University of Toronto, Toronto, ON, Canada

<sup>7</sup> Department of Neurology, Juntendo Tokyo Koto Geriatric Medical Center, and Faculty of Medicine, University & Post Graduate University of Juntendo, Tokyo, Japan

**\*Corresponding author at:** Preclinical Imaging, Brain Health Imaging Centre, Centre for Addiction and Mental Health, 250 College Street, Toronto, ON, Canada M5T 1R8. Telephone: 416-535-8501 ext. 36422; E-mail: [Junchao.tong@camh.ca](mailto:Junchao.tong@camh.ca)

**Supplementary Figure:** Scatter plots of levels of serotonin transporter (SERT) in brain of control subjects and users of cocaine and heroin who were tested negative (-alcohol) or positive (+alcohol) for blood alcohol at the time of autopsy. \*P < 0.05, +alcohol vs. -alcohol (Mann-Whitney U-test).

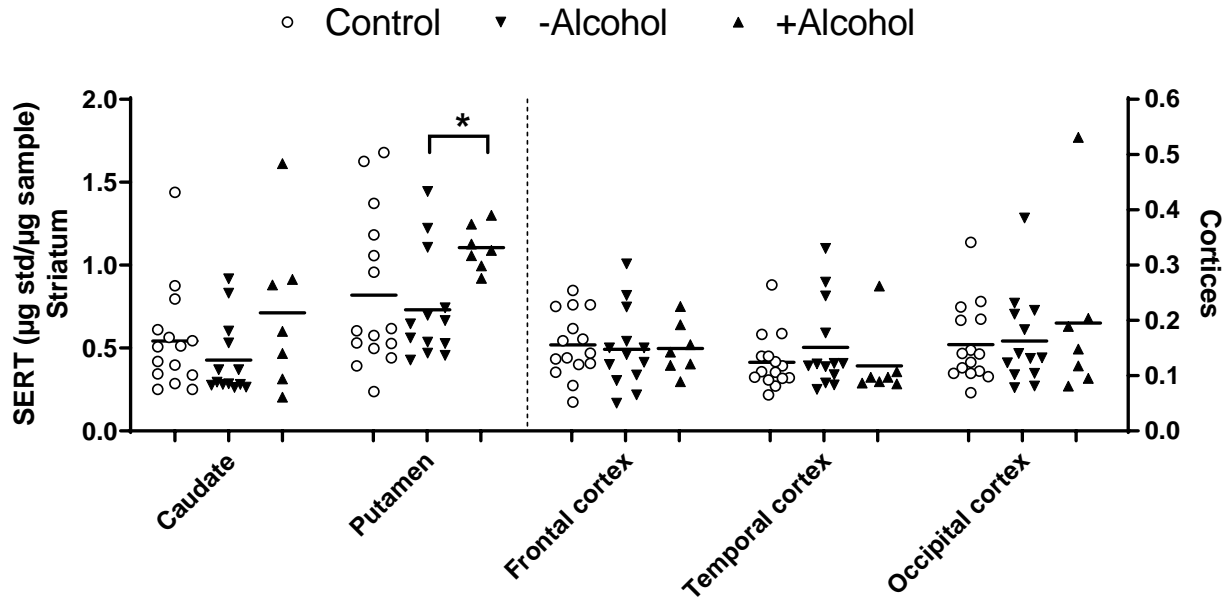

Supplement: NIHMS1600872-supplement-213_2020_5562_MOESM1_ESM.pdf [file NIHMS1600872-supplement-213_2020_5562_MOESM1_ESM.pdf]
